# Supplementary material
Source: publisher figshare collection journal article supplement (https://gsapubs.figshare.com/ndownloader/files/39537016)
Supplement: Supplementary file 1 [file 39537016]

## Sheet: Table S1
Table S1. Zircon U-Pb dating results for the doritic and granitic rocks of the Mangling intrusive complex.
Spot No.	Content (ppm)		Th/U	Isotopic ratios						Isotopic age (Ma)
	Th	U		207Pb/206Pb	1σ	207Pb/235U	1σ	206Pb/238U	1σ	207Pb/206Pb	1σ	207Pb/235U	1σ	206Pb/238U	1σ
ML20-006 Biotite diorite enclave
ML20-006-03	206.112	407.006	0.50641	0.054009	0.00207944	0.17207	0.00655499	0.0233669	0.000360894	372.275	87.0275	161.214	5.67975	148.9	2.27477
ML20-006-05	2718.07	1493.22	1.82027	0.0519845	0.00111652	0.167855	0.00364259	0.0234027	0.00026092	283.395	48.145	157.556	3.16883	149.125	1.64551
ML20-006-06	246.433	495.19	0.497654	0.0529005	0.0018885	0.171199	0.00603805	0.0234544	0.00031189	324.13	112.025	160.459	5.23589	149.451	1.96615
ML20-006-10	2733.28	1788.6	1.52816	0.0518473	0.00122436	0.168579	0.00450144	0.0234712	0.000304976	279.69	49.07	158.185	3.9128	149.557	1.92261
ML20-006-11	1460.88	1191.53	1.22606	0.0524726	0.00205753	0.168322	0.00633052	0.0233157	0.000243003	305.615	90.73	157.962	5.50287	148.577	1.53291
ML20-006-15	2020.82	1374.26	1.47048	0.0524916	0.00117121	0.170711	0.00414967	0.0234813	0.000255638	305.615	56.475	160.036	3.60075	149.62	1.61217
ML20-006-16	1176.35	801.062	1.46848	0.0487355	0.00137018	0.157113	0.00426402	0.0234557	0.000304693	200.075	60.18	148.173	3.74309	149.459	1.92086
ML20-006-17	5575.94	1959.23	2.84599	0.0510189	0.00108548	0.165549	0.00376377	0.0236042	0.000320414	242.66	54.62	155.549	3.28056	150.394	2.01952
ML20-006-20	3201.46	1546.62	2.06997	0.0528832	0.00147504	0.173172	0.00403788	0.023662	0.000290281	324.13	64.81	162.168	3.49654	150.758	1.82983
ML20-006-22	1326.87	853.105	1.55534	0.0511937	0.00146407	0.165845	0.0049913	0.0234867	0.000294752	250.065	66.655	155.807	4.34842	149.654	1.85825
ML20-006-23	4466.1	2279.16	1.95954	0.0544895	0.00107658	0.176526	0.00364904	0.0234815	0.000273267	390.79	44.44	165.067	3.15125	149.621	1.72307
ML20-006-26	568.485	492.674	1.15388	0.0488955	0.00160156	0.159169	0.00551927	0.0235027	0.000287826	142.68	75.915	149.975	4.83572	149.755	1.81464
ML20-006-29	749.534	701.323	1.06874	0.046543	0.00130049	0.151382	0.00421002	0.0236113	0.000270253	33.43	66.66	143.132	3.71402	150.439	1.70391
ML20-006-30	2216.59	1343.25	1.65018	0.0478804	0.00100848	0.156166	0.00384411	0.0235332	0.000304519	100.09	49.995	147.342	3.37751	149.947	1.91963
ML20-006-32	333.662	527.949	0.631997	0.0528383	0.00175749	0.170755	0.00594459	0.0233868	0.00028671	320.43	75.9175	160.074	5.15683	149.025	1.80781
ML20-006-33	1652.56	1203.72	1.37288	0.0483174	0.00130155	0.156066	0.0042884	0.0234266	0.000278713	122.31	62.9575	147.253	3.76787	149.276	1.75742
ML20-006-35	1284.57	777.087	1.65306	0.0477137	0.00132766	0.154907	0.00428205	0.0235682	0.000296863	83.425	66.66	146.236	3.76605	150.168	1.8714
ML20-011 Biotite diorite
ML20-011-01	993.004	512.551	1.93738	0.0486872	0.00185195	0.155633	0.00583112	0.0232345	0.000302889	131.57	90.7275	146.873	5.12442	148.065	1.90988
ML20-011-04	1113.5	535.71	2.07855	0.0481062	0.00200013	0.152472	0.00601535	0.0230176	0.000276638	105.645		144.092	5.30072	146.699	1.745
ML20-011-05	1010.38	523.039	1.93174	0.0490337	0.00132489	0.156127	0.00428803	0.0230932	0.000286585	150.085	64.805	147.307	3.76734	147.175	1.80749
ML20-011-06	1009.32	493.383	2.04572	0.0483247	0.00150721	0.154524	0.00485324	0.0232322	0.000284999	122.31	74.0675	145.899	4.26949	148.051	1.79729
ML20-011-07	1786.9	700.85	2.54961	0.0504224	0.00142465	0.161065	0.00459764	0.0231684	0.00026208	213.035	66.655	151.635	4.02209	147.649	1.65314
ML20-011-08	449.786	282.731	1.59086	0.0496102	0.00207118	0.156655	0.00619886	0.0231355	0.000304256	176.01	98.1325	147.771	5.44267	147.442	1.91866
ML20-011-09	322.074	212.771	1.51372	0.0478389	0.0026304	0.151091	0.00861271	0.0230934	0.000376315	100.09	116.65	142.874	7.59794	147.177	2.37246
ML20-011-10	1647.72	704.044	2.34037	0.0490588	0.00136884	0.15734	0.00447192	0.0232213	0.000276866	150.085	64.805	148.372	3.9247	147.982	1.74612
ML20-011-11	868.598	476.016	1.82472	0.0509725	0.00168084	0.162454	0.00523847	0.0231517	0.000258257	238.955	80.5425	152.849	4.57689	147.544	1.62911
ML20-011-12	586.224	352.552	1.6628	0.0506719	0.00199489	0.160868	0.00614351	0.0231741	0.000271371	233.4	95.355	151.462	5.37457	147.685	1.71161
ML20-011-13	424.219	250.048	1.69655	0.0497767	0.00239343	0.156289	0.00716965	0.0230148	0.000305763	183.415	111.095	147.45	6.29675	146.681	1.92836
ML20-011-14	1080.29	511.079	2.11375	0.0488579	0.00146637	0.155904	0.00470275	0.0231151	0.000230796	142.68	65.73	147.112	4.13226	147.313	1.45636
ML20-011-15	831.582	447.868	1.85676	0.0502131	0.00161825	0.158552	0.00462536	0.0231203	0.000313543	205.63	75.9125	149.435	4.05505	147.346	1.97715
ML20-011-16	449.792	383.648	1.17241	0.0485947	0.00163789	0.153898	0.00511066	0.0229867	0.000255422	127.865	74.99	145.348	4.49826	146.504	1.6115
ML20-011-17	1106.47	508.143	2.17747	0.0470331	0.00142271	0.150178	0.00461679	0.0231824	0.000278201	50.095	70.365	142.069	4.07687	147.737	1.75458
ML20-011-18	978.591	550.085	1.77898	0.0507146	0.00145737	0.161424	0.00450886	0.0230907	0.000246227	227.845	66.655	151.949	3.94326	147.16	1.55349
ML20-011-19	990.414	490.987	2.01719	0.0483715	0.00144979	0.154515	0.00469174	0.0231168	0.00024297	116.755	65.735	145.89	4.12753	147.324	1.53296
ML20-011-20	740.404	372.993	1.98504	0.0491077	0.00178841	0.156621	0.00578451	0.0231039	0.000265825	153.79	85.17	147.741	5.07914	147.243	1.6768
ML20-011-21	508.92	315.258	1.61429	0.0503626	0.00168979	0.160668	0.00546509	0.0230964	0.000264683	213.035	77.765	151.287	4.78211	147.196	1.66963
ML20-011-22	898.514	449.201	2.00025	0.0502037	0.00161057	0.160196	0.00550631	0.0230403	0.000257879	211.185	74.0625	150.875	4.82012	146.842	1.62689
ML20-011-23	612.966	388.119	1.57932	0.050049	0.00173831	0.159337	0.00580741	0.0231021	0.000292293	198.23	76.84	150.123	5.08734	147.232	1.84341
ML20-011-24	656.77	379.651	1.72993	0.0484039	0.00149539	0.160111	0.00520023	0.0238408	0.000280403	120.46	67.585	150.8	4.55264	151.884	1.76741
ML20-011-26	415.517	250.304	1.66005	0.0463512	0.00207855	0.145048	0.00616593	0.0230292	0.000311573	16.765	103.695	137.53	5.4685	146.772	1.96491
ML20-011-27	1621.87	754.454	2.14973	0.0477018	0.00125541	0.152266	0.00403513	0.0231475	0.000287903	83.425	62.955	143.91	3.55713	147.518	1.8157
ML20-011-28	1192.41	610.303	1.95381	0.0476716	0.00136846	0.149748	0.00375986	0.0229818	0.00027341	83.425	68.5125	141.689	3.32186	146.474	1.72473
ML20-011-30	350.09	286.894	1.22028	0.0495423	0.00172658	0.158767	0.00559066	0.0232329	0.000295663	172.305	76.84	149.623	4.89994	148.055	1.86441
ML20-011-32	307.611	191.456	1.60669	0.0506854	0.00238091	0.161564	0.00763812	0.0231427	0.000305293	233.4	104.615	152.071	6.67768	147.487	1.92518
ML20-011-33	1446.81	643.332	2.24894	0.0493242	0.00133072	0.15739	0.00446867	0.0230819	0.000233048	164.9	67.58	148.416	3.92168	147.104	1.47058
ML20-011-35	410.4	326.706	1.25618	0.0516839	0.00199481	0.163916	0.00624794	0.0230635	0.000254166	272.285	88.875	154.125	5.45161	146.988	1.60349
ML20-007 Medium- to fine-grained monzogranite
ML20-007-01	188.114	318.74	0.590181	0.0480042	0.00201723	0.151144	0.00618642	0.0228983	0.000280465	98.24	96.285	142.921	5.45769	145.947	1.76928
ML20-007-02	611.403	938.397	0.65154	0.0496653	0.00118387	0.155249	0.00371794	0.0225986	0.000260725	188.97	55.545	146.536	3.26932	144.058	1.64544
ML20-007-04	573.273	885.03	0.647744	0.0495939	0.00143242	0.154864	0.00427195	0.0226341	0.000247902	176.01	68.5075	146.198	3.75731	144.282	1.56465
ML20-007-05	340.003	615.547	0.55236	0.0491408	0.00154837	0.153578	0.00478743	0.0226267	0.000237031	153.79	76.84	145.066	4.21507	144.235	1.49622
ML20-007-06	609.998	1120.09	0.544596	0.0474813	0.0011254	0.148883	0.00346989	0.0227021	0.000252911	72.315	55.55	140.925	3.06818	144.711	1.59609
ML20-007-07	254.897	444.073	0.573998	0.0500009	0.0019317	0.156397	0.00583438	0.0227416	0.000301782	194.525	90.7275	147.544	5.12391	144.959	1.90377
ML20-007-08	527.597	882.375	0.597929	0.05159	0.001654	0.162217	0.00544399	0.0227464	0.000272618	333.39	74.0625	152.642	4.75734	144.99	1.7201
ML20-007-09	551.023	955.308	0.576802	0.0505777	0.0012016	0.159197	0.00413159	0.0226973	0.000262948	220.44	55.545	150	3.62044	144.68	1.65929
ML20-007-10	754.881	846.086	0.892204	0.0484751	0.00119033	0.152804	0.0038253	0.022829	0.000283192	124.16	62.03	144.384	3.37074	145.51	1.78656
ML20-007-11	804.656	1176.01	0.684224	0.0503169	0.00113355	0.157967	0.00376605	0.0226876	0.000242013	209.33	47.2125	148.922	3.30387	144.619	1.5275
ML20-007-12	497.284	673.478	0.738382	0.0491525	0.00156804	0.154111	0.00507939	0.0226904	0.000259751	153.79	74.0625	145.535	4.46993	144.637	1.63918
ML20-007-13	356.046	533.068	0.667918	0.0493497	0.00158439	0.153878	0.004925	0.0226264	0.000273394	164.9	75.9125	145.33	4.335	144.233	1.72518
ML20-007-14	422.79	635.298	0.665498	0.0483298	0.00137919	0.151109	0.00428938	0.0226865	0.000251993	122.31	66.66	142.891	3.78488	144.612	1.59034
ML20-007-15	664.708	982.752	0.676375	0.0485392	0.00125365	0.152094	0.00430494	0.0226467	0.000283414	124.16	61.105	143.759	3.79536	144.361	1.78824
ML20-007-16	365.494	427.361	0.855233	0.0488658	0.00166485	0.153938	0.00514939	0.0228866	0.000261882	142.68	79.6175	145.383	4.53218	145.873	1.65231
ML20-007-17	375.747	614.145	0.611822	0.0507404	0.00151826	0.158338	0.00485202	0.0226696	0.0002674	227.845	65.73	149.247	4.25442	144.506	1.68736
ML20-007-18	544.818	745.571	0.730738	0.0511037	0.00137802	0.159988	0.00399389	0.0228221	0.000253127	255.62	58.3225	150.692	3.49751	145.467	1.59728
ML20-007-19	482.075	872.024	0.552823	0.0489109	0.00130516	0.153114	0.00404016	0.0227167	0.000251208	142.68	62.955	144.657	3.55895	144.802	1.58535
ML20-007-22	219.726	379.935	0.578324	0.0516548	0.00186391	0.162898	0.00574116	0.0229359	0.000294526	333.39	83.32	153.237	5.01397	146.184	1.85775
ML20-007-23	549.056	687.799	0.79828	0.0495032	0.00130656	0.153991	0.00407568	0.0225354	0.000232075	172.305	61.1	145.43	3.5875	143.66	1.46513
ML20-007-24	520.31	1104.55	0.471059	0.0490516	0.00110983	0.153216	0.00371671	0.0225985	0.000265513	150.085	56.4725	144.748	3.27397	144.057	1.67559
ML20-007-25	532.426	993.025	0.536166	0.0496776	0.00107568	0.154879	0.0034806	0.0225697	0.000242205	188.97	49.99	146.211	3.0618	143.876	1.52887
ML20-007-26	696.641	836.101	0.833202	0.0515689	0.0013562	0.162402	0.00460708	0.0227644	0.000291972	264.88	59.25	152.804	4.02573	145.103	1.84194
ML20-007-27	562.134	769.71	0.730319	0.0476311	0.00126034	0.150113	0.00377966	0.0228497	0.000216257	79.72	62.9575	142.012	3.33829	145.641	1.36521
ML20-007-28	976.64	1247.1	0.783128	0.0502622	0.00114457	0.156795	0.00366914	0.0225517	0.000246089	205.63	51.84	147.894	3.22217	143.763	1.55335
ML20-007-29	841.147	1178.59	0.713692	0.0484262	0.00118135	0.151182	0.00368454	0.022631	0.000272552	120.46	57.4025	142.955	3.25135	144.262	1.71987
ML20-003 Fine-grained monzogranite
ML20-003-01	136.696	78.6682	1.73763	0.0543501	0.00449968	0.168664	0.0142414	0.022503	0.000473035	387.09	187.012	158.258	12.374	143.456	2.98328
ML20-003-02	700.576	1461.43	0.479377	0.0485698	0.00117678	0.149368	0.00355195	0.0222628	0.000214233	127.865	52.7725	141.354	3.13936	141.941	1.35313
ML20-003-03	555.68	962.953	0.577059	0.0511155	0.00131781	0.157685	0.00412969	0.0223348	0.000249924	255.62	59.2475	148.675	3.62348	142.395	1.57779
ML20-003-04	572.511	1138.75	0.502752	0.0500794	0.00113211	0.15459	0.00370196	0.0222964	0.000237012	198.23	51.8425	145.957	3.25714	142.153	1.49653
ML20-003-05	563.687	718.56	0.784468	0.0496796	0.00148221	0.153295	0.00434398	0.022436	0.000255639	188.97	73.135	144.817	3.82579	143.033	1.61364
ML20-003-06	758.678	1733.93	0.437548	0.0479803	0.000898288	0.147994	0.00283855	0.0223116	0.000235467	98.24	44.44	140.139	2.51246	142.249	1.48677
ML20-003-07	303.423	628.211	0.482996	0.0521108	0.00152353	0.168305	0.00501949	0.0233834	0.000279956	300.06	73.14	157.947	4.3638	149.003	1.76531
ML20-003-13	745.353	1558.42	0.478275	0.0505827	0.00130289	0.155244	0.00379266	0.0222881	0.000211789	220.44	59.2475	146.532	3.33499	142.101	1.33772
ML20-003-15	587.268	1553.75	0.377968	0.0544347	0.0011698	0.175453	0.003861	0.0233328	0.000238696	390.79	48.1425	164.141	3.33709	148.685	1.50579
ML20-003-16	670.298	972.502	0.689251	0.048585	0.00118843	0.148619	0.00369467	0.0222176	0.000299689	127.865	52.7725	140.692	3.2675	141.656	1.89148
ML20-003-18	1093.46	1679.75	0.650963	0.0496926	0.00109508	0.153755	0.00361261	0.0223423	0.000223651	188.97	51.8425	145.222	3.18087	142.442	1.41234
ML20-003-19	323.058	302.678	1.06733	0.0540057	0.00241815	0.174978	0.00720457	0.0238194	0.000343627	372.275	72.215	163.73	6.22699	151.75	2.16518
ML20-003-21	559.773	304.397	1.83895	0.0503708	0.00198644	0.155007	0.00628123	0.0222703	0.000314165	213.035	92.5775	146.323	5.52281	141.988	1.9826
ML20-003-23	926.118	1113.72	0.831555	0.0496971	0.00119826	0.158639	0.00369309	0.0231054	0.000243523	188.97	55.545	149.511	3.23807	147.252	1.53646
ML20-003-24	631.493	1524.14	0.414327	0.0481751	0.0010866	0.148933	0.00334985	0.0223075	0.000225706	109.35	56.475	140.969	2.96203	142.223	1.42532
P003-2 K-feldspar granite
P003-2-01	277.498	378.063	0.734	0.0648072	0.00108089	1.16258	0.0214687	0.129466	0.00146718	768.52	234.255	783.166	10.0941	784.82	8.38462
P003-2-02	445.522	490.624	0.908072	0.109072	0.00143776	4.74088	0.0714366	0.313905	0.00360082	1784.26	24.075	1774.5	12.6924	1759.89	17.6922
P003-2-03	342.606	1122.13	0.305318	0.0511791	0.00107044	0.155912	0.00329164	0.0220612	0.00024822	255.62	48.1375	147.119	2.89319	140.669	1.56743
P003-2-05	309.11	546.291	0.565834	0.161476	0.00191212	10.4537	0.152156	0.466993	0.00505537	2472.22	20.065	2475.82	13.5935	2470.36	22.2549
P003-2-06	743.359	1373.79	0.541101	0.0484961	0.00102101	0.161406	0.00391007	0.0241041	0.000391589	124.16	49.995	151.933	3.42002	153.542	2.46632
P003-2-07	469.93	648.512	0.724628	0.0512905	0.00124661	0.256407	0.00637824	0.0361777	0.000432308	253.77	55.545	231.768	5.15708	229.097	2.69238
P003-2-09	944.454	669.426	1.41084	0.0511028	0.00162518	0.169429	0.0050665	0.0241924	0.000321309	255.62	72.21	158.924	4.40043	154.097	2.02408
P003-2-10	375.992	659.06	0.570498	0.049254	0.00135518	0.149898	0.00415208	0.0220994	0.00030167	166.75	69.4325	141.822	3.66764	140.911	1.90416
P003-2-11	511.545	487.561	1.04919	0.0465634	0.00139957	0.153299	0.00464998	0.0238134	0.000279051	33.43	64.81	144.82	4.0951	151.712	1.75895
P003-2-12	188.839	307.434	0.614242	0.0478105	0.00178437	0.146197	0.00512349	0.0222847	0.000290548	100.09	75.92	138.549	4.53973	142.079	1.83377
P003-2-13	961.88	1482.01	0.649038	0.0485697	0.000961454	0.148306	0.00295211	0.022092	0.000233009	127.865	46.2925	140.415	2.61213	140.864	1.47157
P003-2-14	203.203	550.118	0.369382	0.0499762	0.00148113	0.153097	0.00456333	0.0221955	0.000270073	194.525	68.5075	144.643	4.01953	141.517	1.70491
P003-2-17	870.59	1511.26	0.576069	0.0515729	0.00117977	0.15699	0.00365651	0.0219858	0.000243714	264.88	51.845	148.065	3.21056	140.194	1.53914
P003-2-19	210.392	568.41	0.370141	0.061321	0.00100446	0.89613	0.0167483	0.105572	0.00140835	650.015	35.1825	649.657	8.97963	646.982	8.21928
P003-2-21	246.896	274.05	0.900915	0.0517593	0.00237118	0.165156	0.00705985	0.0236354	0.000386503	275.99	105.54	155.206	6.15326	150.591	2.43539
P003-2-24	324.01	251.367	1.28899	0.0528687	0.00288419	0.160546	0.00784834	0.0222256	0.000325812	324.13	124.058	151.181	6.86743	141.707	2.05608
P003-2-25	303.672	612.768	0.495574	0.04711	0.00144463	0.157173	0.00483909	0.0242099	0.000310257	53.8	74.065	148.226	4.24734	154.208	1.95455
P003-2-26	200.799	819.449	0.245041	0.0485309	0.00117032	0.162546	0.00411953	0.0242098	0.000352975	124.16	55.55	152.929	3.59955	154.207	2.2232
P003-2-27	297.75	284.961	1.04488	0.0518055	0.00188795	0.158642	0.00596632	0.0222924	0.000368253	275.99	87.95	149.514	5.22961	142.128	2.32342
P003-2-28	602.594	400.426	1.50488	0.0523267	0.00175143	0.16107	0.00545158	0.0222884	0.000308062	298.21	77.77	151.639	4.76865	142.102	1.94411
P003-2-29	342.769	274.063	1.25069	0.0501372	0.00182057	0.167463	0.00583764	0.0244048	0.000360156	211.185	80.5425	157.215	5.07833	155.434	2.26796
P003-2-31	1511.27	1127.99	1.33979	0.0502792	0.00109433	0.15294	0.00338745	0.0221032	0.000285485	209.33	45.36	144.505	2.98492	140.934	1.80216
P003-2-32	326.07	484.364	0.673191	0.0669689	0.0010328	1.26782	0.0204936	0.137221	0.0015184	836.72	36.11	831.415	9.1931	828.93	8.61877
P003-2-33	402.094	1088.55	0.369386	0.0533435	0.00125914	0.176997	0.00559967	0.0238315	0.000408304	342.65	47.2175	165.473	4.83209	151.826	2.57213
P003-2-34	373.196	655.936	0.568951	0.0500581	0.00159204	0.150721	0.00475735	0.0219697	0.000298906	198.23	106.465	142.548	4.19895	140.093	1.88697
P003-2-35	463.815	1046.38	0.443256	0.052069	0.00124396	0.169382	0.00443719	0.023562	0.000316527	287.1	55.55	158.882	3.85436	150.128	1.99514
Note: The italic data with red color represent inherited zircons.
